# Supplementary material for: Mitochondria Isolated from Hearts Subjected to Ischemia/Reperfusion Benefit from Adenine Nucleotide Translocase 1 Overexpression
Source: MDPI journal article supplement (doi:10.3390/membranes11110836), 2021-10-29
Supplement: s1 [file s1]

# Mitochondria isolated from hearts subjected to ischemia/reperfusion benefit from adenine nucleotide translocase 1 overexpression

Andrea Dörner<sup>1,2</sup>, Oleg Lynetskiy<sup>3</sup>, Gerhild Euler<sup>3</sup>, Ulf Landmesser<sup>1,2</sup>, Klaus-Dieter Schlüter<sup>3</sup> and

Jacqueline Heger<sup>3\*</sup>

<sup>1</sup> Charité – Universitätsmedizin Berlin, corporate member of Freie Universität Berlin, Humboldt-Universität zu Berlin, Institute of Health, Department of Cardiology, Centrum 11, Campus Benjamin Franklin, Berlin, Germany; [andrea.doerner@charite.de](mailto:andrea.doerner@charite.de) (A.D.); [Ulf.Landmesser@charite.de](mailto:Ulf.Landmesser@charite.de) (U.L.)

<sup>2</sup> DZHK (German Centre for Cardiovascular Research, partner site Berlin, Berlin, Germany)

<sup>3</sup> Justus-Liebig-Universität Gießen, Physiologisches Institut, Gießen, Germany; [Oleg-Lynetskiy@gmx.de](mailto:Oleg-Lynetskiy@gmx.de) (O.L.); [Gerhild.Euler@physiologie.med.uni-giessen.de](mailto:Gerhild.Euler@physiologie.med.uni-giessen.de) (G.E.); [Klaus-Dieter.Schluter@physiologie.med.uni-giessen.de](mailto:Klaus-Dieter.Schluter@physiologie.med.uni-giessen.de) (K-D.S.); [Jacqueline.Heger@physiologie.med.uni-giessen.de](mailto:Jacqueline.Heger@physiologie.med.uni-giessen.de) (J.H.)

\* [Jacqueline.Heger@physiologie.med.uni-giessen.de](mailto:Jacqueline.Heger@physiologie.med.uni-giessen.de)

## Hemodynamic parameters

|         | dP/dt max (mmHg/sec) |   |      |       |          |
|---------|----------------------|---|------|-------|----------|
|         | Baseline             |   |      | R120  |          |
| WT      | 2600                 | ± | 171  | 1150  | ± 148*** |
| ANT1-TG | 2237                 | ± | 108  | 1316  | ± 115*** |
|         | dP/dt min (mmHg/sec) |   |      |       |          |
|         | Baseline             |   |      | R120  |          |
| WT      | -1513                | ± | 119  | -836  | ± 93***  |
| ANT1-TG | -1384                | ± | 85   | -889  | ± 72***  |
|         | P sys (mmHg)         |   |      |       |          |
|         | Baseline             |   |      | R120  |          |
| WT      | 87.9                 | ± | 9.3  | 62.4  | ± 6.7*   |
| ANT1-TG | 73.4                 | ± | 3.1  | 57.9  | ± 4.3**  |
|         | LVDP (mmHg)          |   |      |       |          |
|         | Baseline             |   |      | R120  |          |
| WT      | 78.1                 | ± | 9.6  | 30.3  | ± 4.3*** |
| ANT1-TG | 62.0                 | ± | 3.2  | 34.3  | ± 3.1*** |
|         | HR (bpm)             |   |      |       |          |
|         | Baseline             |   |      | R120  |          |
| WT      | 206.5                | ± | 15.0 | 231.2 | ± 24.3   |
| ANT1-TG | 212.7                | ± | 8.8  | 239.9 | ± 14.0   |

**Table S1.** The following hemodynamic parameters were recorded during the pre-ischemic stabilization phase (baseline) and after 120 minutes (R 120) of reperfusion: the maximal rate of left ventricular pressure (dP/dt max), the minimal rate of left ventricular pressure (dP/dt min), systolic pressure (P sys), (left ventricular developed pressures (LVDPs) and heart rates (HRs). WT, n=15, ANT1-TG, n=19. Data represent the mean ± SEM. \*, p <0.05; \*\*, p <0.01; \*\*\*, p<0.001 for baseline vs reperfusion with unpaired t-test.

### Western blot analysis

Western blots were performed using a standard protocol (As described in main text), with specific primary antibodies against HSP27 (Santa Cruz Biotechnology, Inc, Heidelberg, Germany).

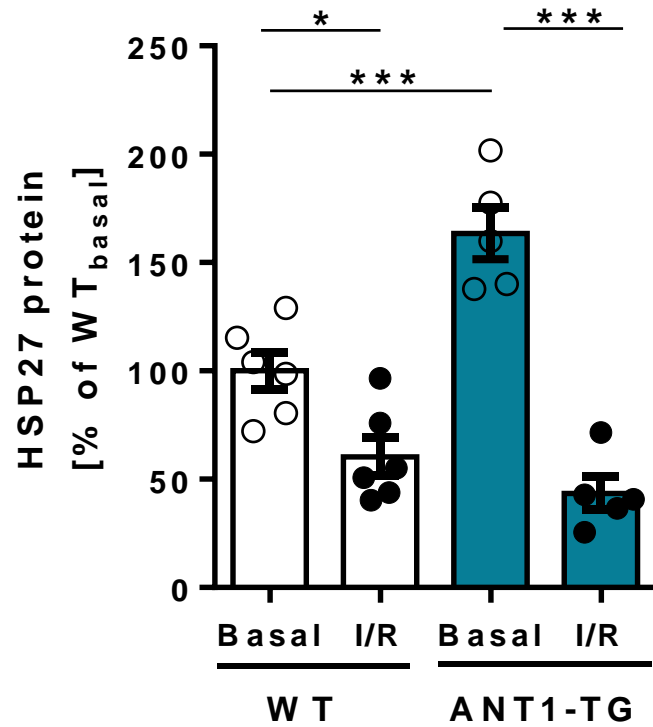

**Figure S1.** HSP27 expression of rat hearts after I/R. Langendorff-perfused WT and ANT1-transgenic hearts were exposed to 45 minutes of ischemia, followed by two hours of reperfusion. Graph shows the quantitative analysis of HSP27 protein. Data are shown for the pre-ischemic stabilization phase (basal) and after 120 minutes of reperfusion (I/R). Data are presented as the mean  $\pm$  SEM, \*,  $p < 0.05$ , \*\*,  $p < 0.01$ , \*\*\*,  $p < 0.001$  determined by ANOVA.
